# Supplementary material for: ExoCAS-2: Rapid and Pure Isolation of Exosomes by Anionic Exchange Using Magnetic Beads
Source: MDPI journal article supplement (doi:10.3390/biomedicines9010028), 2021-01-02
Supplement: s1 [file s1]

Article

# ExoCAS-2: Rapid and Pure Isolation of Exosomes by Anionic Exchange using Magnetic Beads

HyunSung Kim<sup>1</sup>, and Sehyun Shin<sup>1,2,\*</sup>

<sup>1</sup> School of Mechanical engineering, Korea University, Seoul, Korea; [hyunsung24@korea.ac.kr](mailto:hyunsung24@korea.ac.kr) (H. K.)

<sup>2</sup> Engineering Research Center for Biofluid Biopsy, Seoul, Korea; [lexerdshin@korea.ac.kr](mailto:lexerdshin@korea.ac.kr) (S.S.)

\* Correspondence: [lexerdshin@korea.ac.kr](mailto:lexerdshin@korea.ac.kr); Tel.: +82-10-4506-2825

\* To whom correspondence should be addressed:

Sehyun Shin

Telephone: (82) 2-3290-3377

E-mail: [lexerdshin@korea.ac.kr](mailto:lexerdshin@korea.ac.kr)

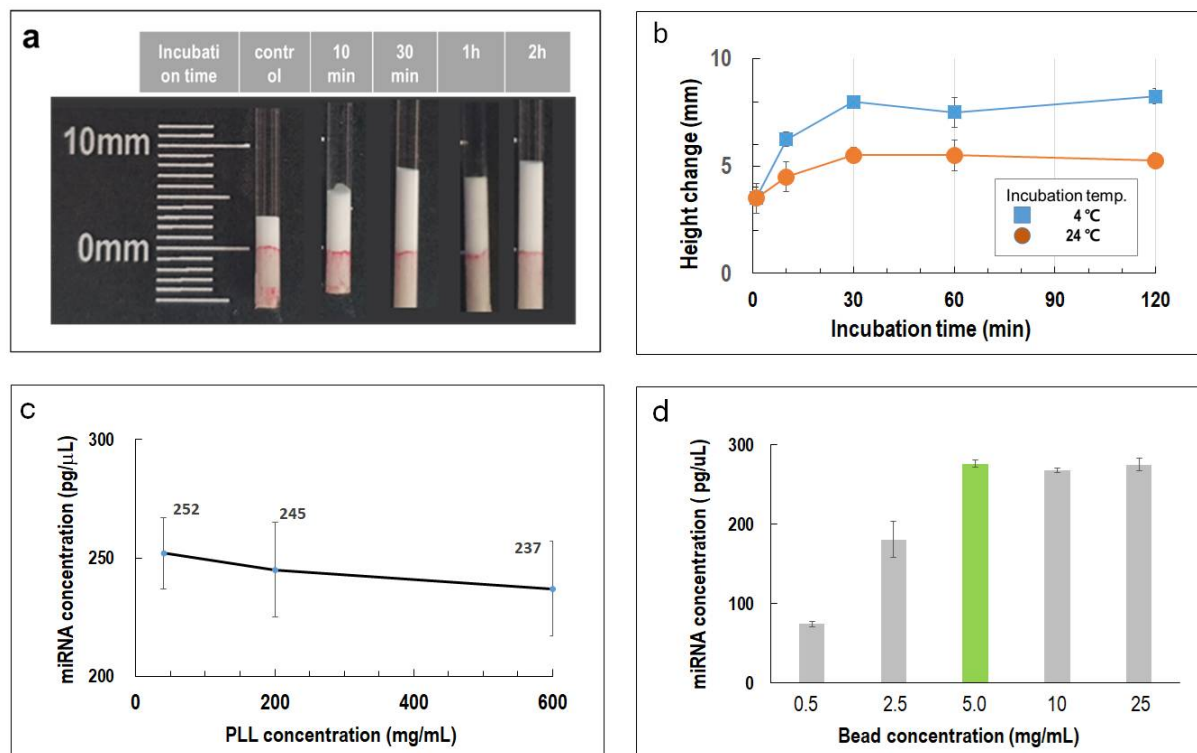

**Figure S1 Changes in microbead volume before and after incubating beads with plasma.**

a) Volume changes of microbeads incubated in the same aliquot of plasma with varying incubation times; b) Effect of PLL concentration on height changes of EV capture for two different incubation times; c) Effect of PLL concentration on extracted miRNA from EVs; d) Effect of bead concentration on extracted miRNA from EVs

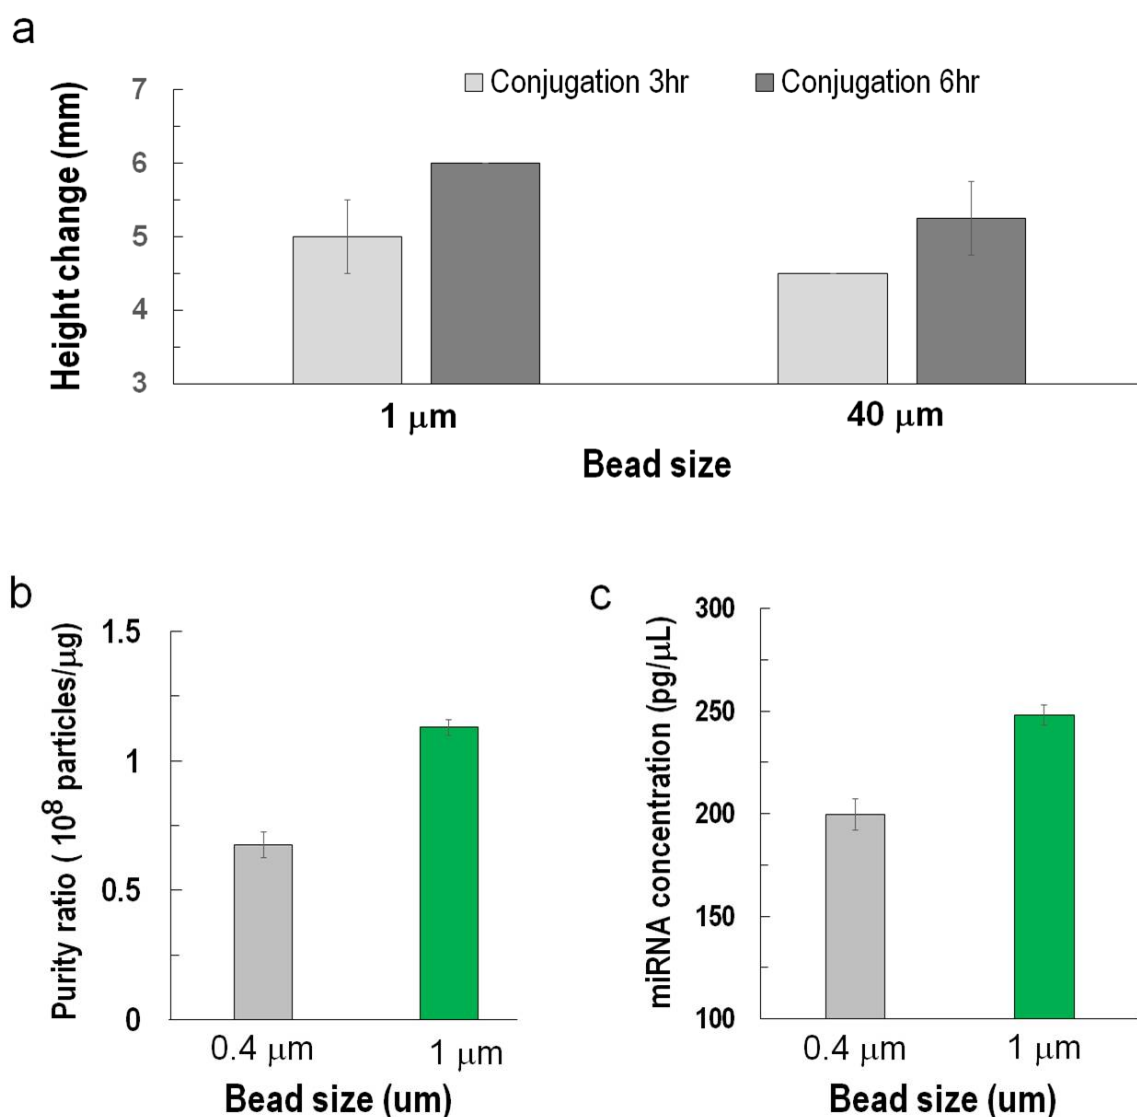

**Figure S2 Comparison of EV isolation performance with two different bead sizes** a) Changes of microbead volume before and after incubating beads in a plasma. Microbeads incubated in the same, aliquot plasma with varying PLL-conjugation time and bead size. b) - c) Effect of bead size on EV capture purity ratio and miRNA concentration
